# Supplementary material
Source: PubMed Central journal article supplement (PMC9255859)

FIGURE S3

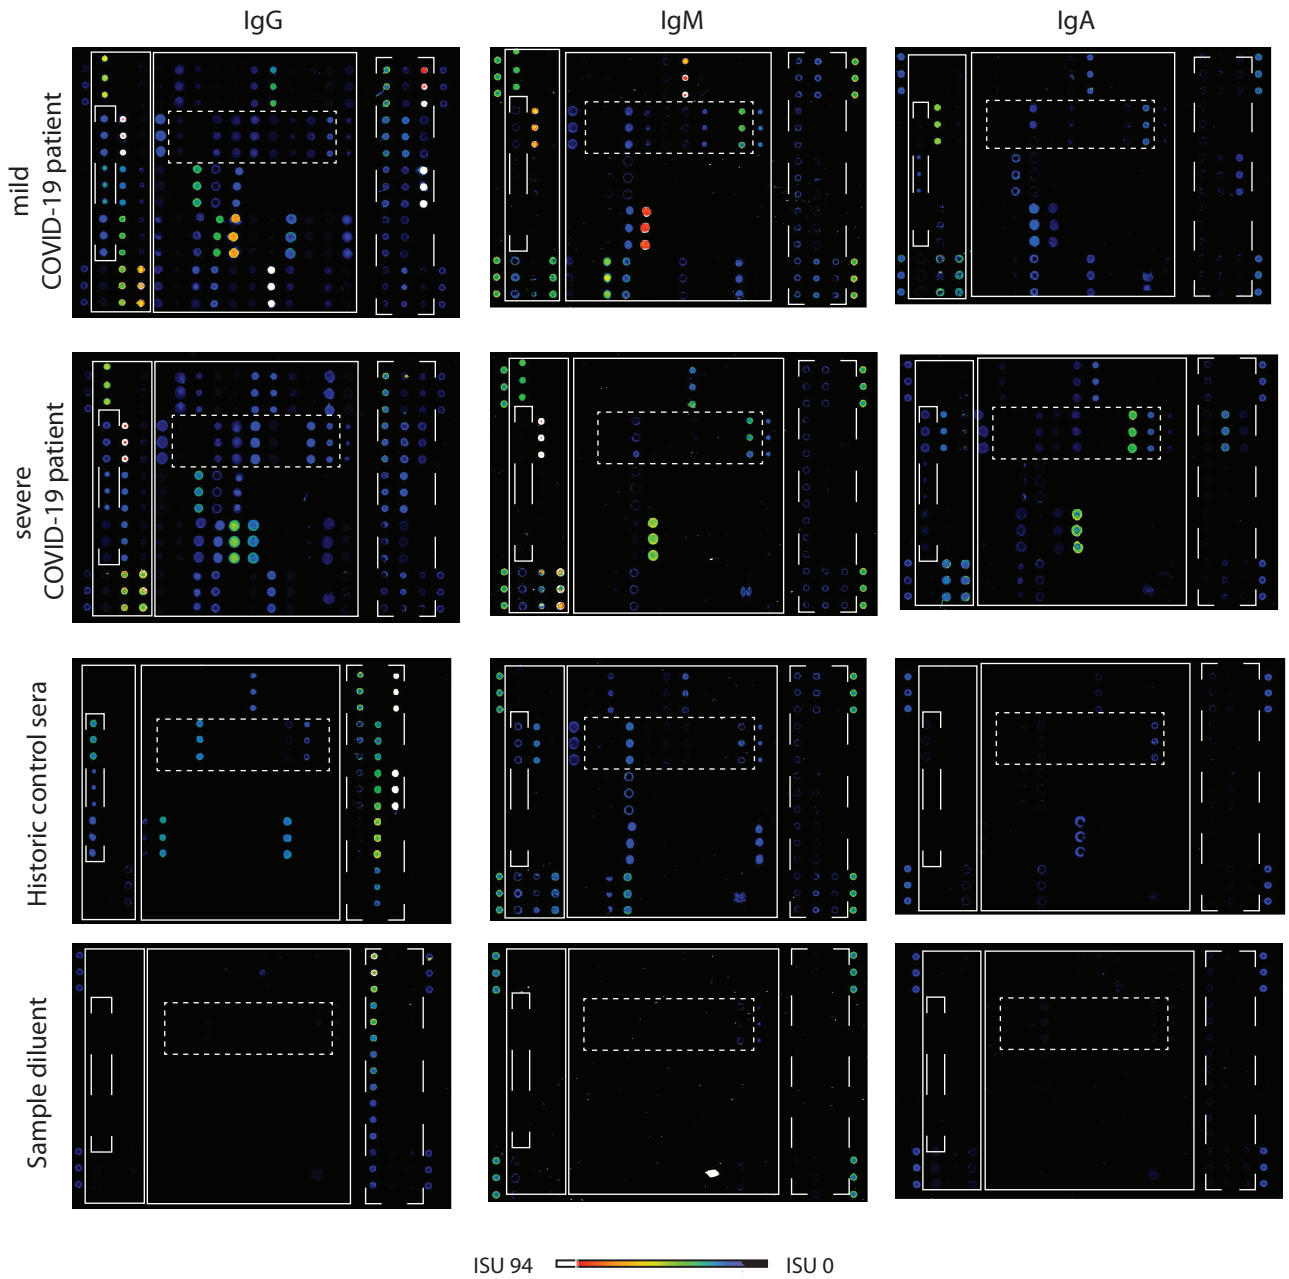

Supplement: ALL-77-230-s001.pdf [file ALL-77-230-s001.pdf]
