# Supplementary material
Source: PubMed Central journal article supplement (PMC9255859)

FIGURE S1

A

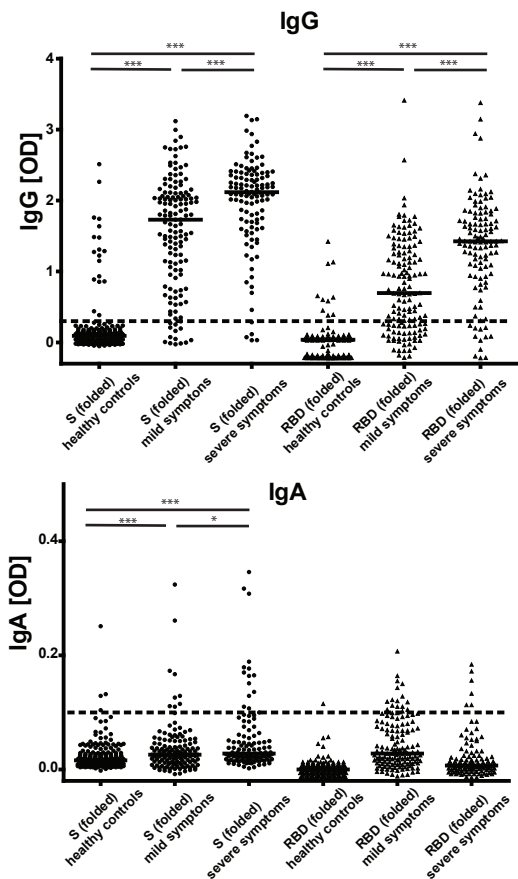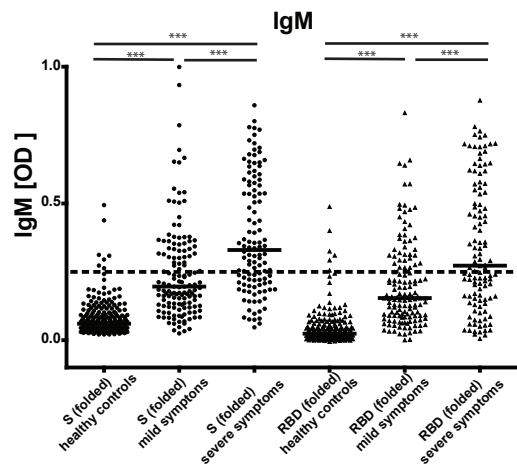

B

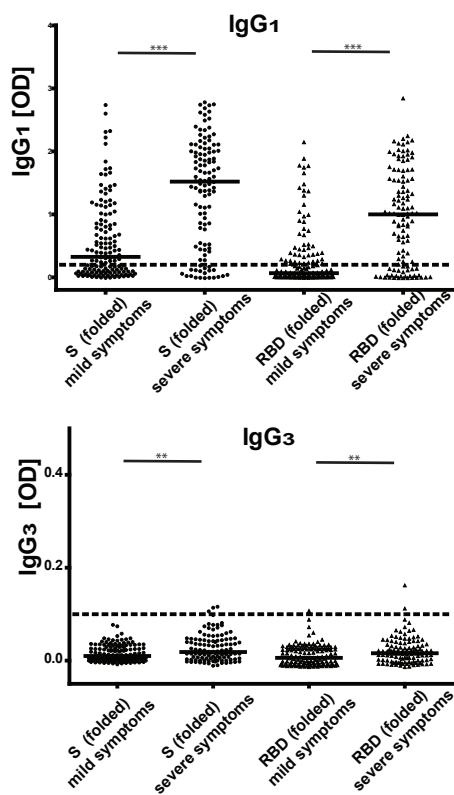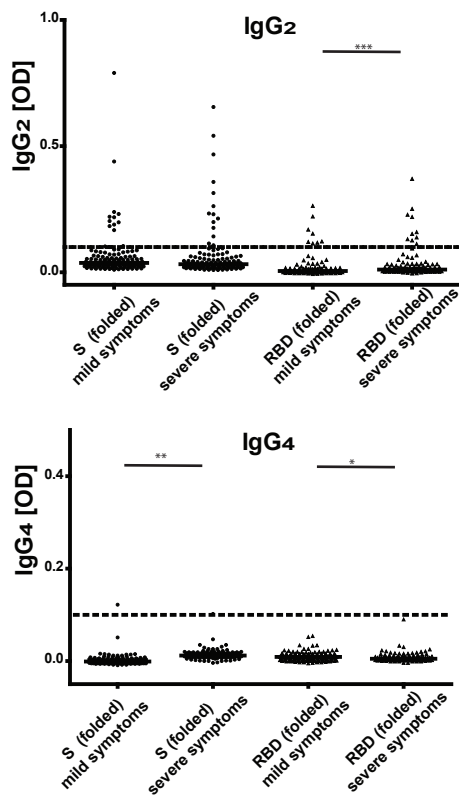

Supplement: ALL-77-230-s003.pdf [file ALL-77-230-s003.pdf]
