# Supplementary material
Source: PubMed Central journal article supplement (PMC9255859)

FIGURE S6

D

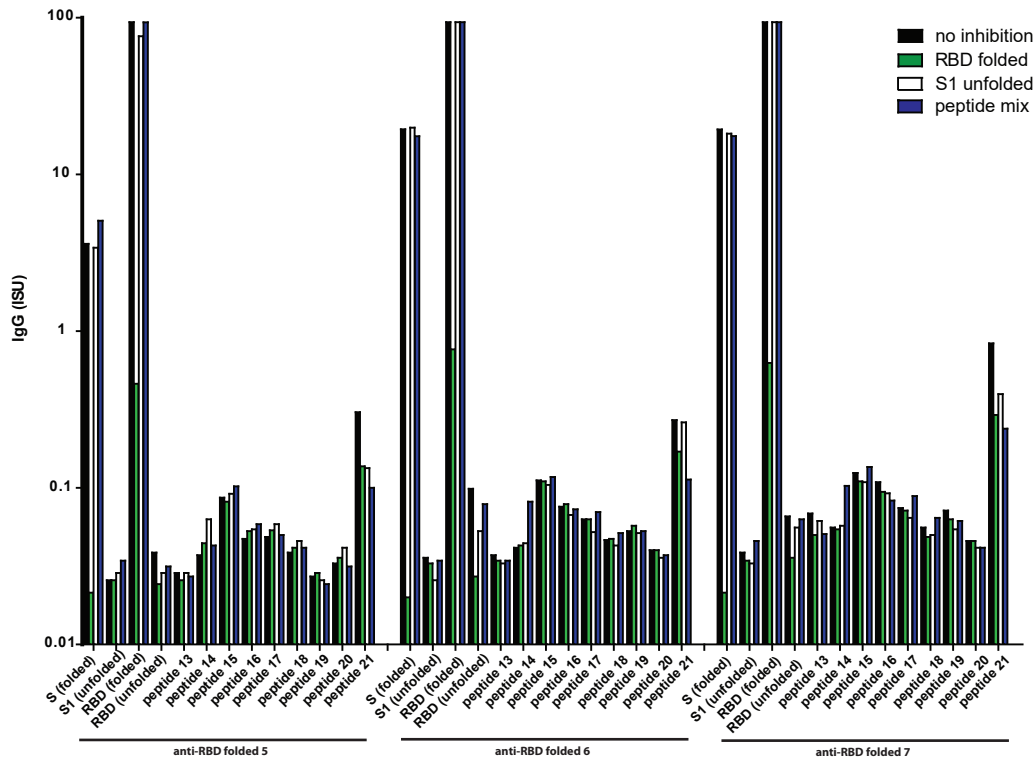

E

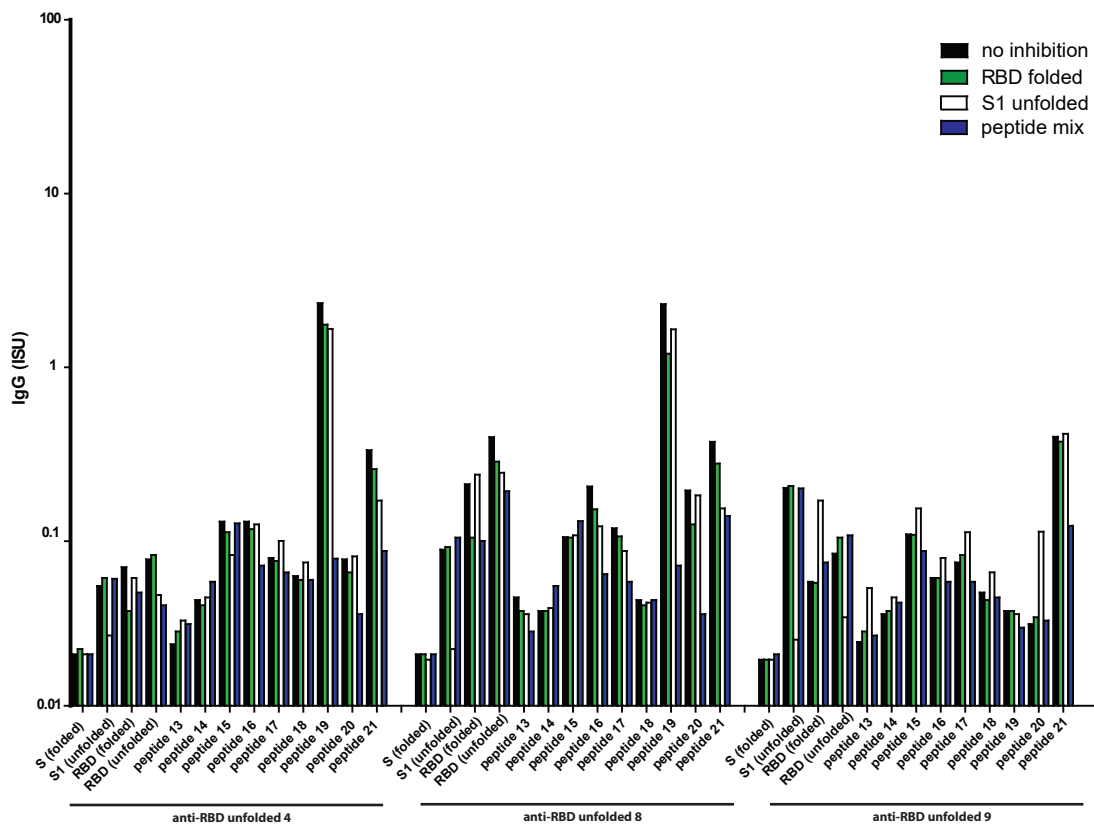

Supplement: ALL-77-230-s004.pdf [file ALL-77-230-s004.pdf]
