# Supplementary material
Source: PubMed Central journal article supplement (PMC9255859)
Supplement: ALL-77-230-s005.pdf [file ALL-77-230-s005.pdf]

FIGURE S4
