# Supplementary material
Source: PubMed Central journal article supplement (PMC9255859)
Supplement: ALL-77-230-s008.pdf [file ALL-77-230-s008.pdf]

FIGURE S6C

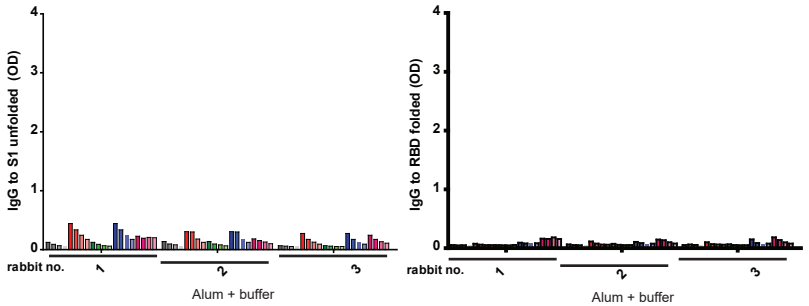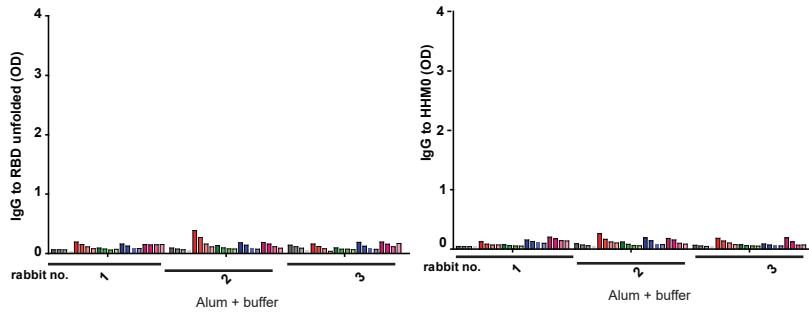

- D0 1:250
- D21 1:250
- D35 1:250
- D42 1:250
- D63 1:250
- D0 1:500
- D21 1:500
- D35 1:500
- D42 1:500
- D63 1:500
- D0 1:1000
- D21 1:1000
- D35 1:1000
- D42 1:1000
- D63 1:1000
- D0 1:2000
- D21 1:2000
- D35 1:2000
- D42 1:2000
- D63 1:2000
