# Supplementary material
Source: PubMed Central journal article supplement (PMC9255859)

# FIGURE S2

## A

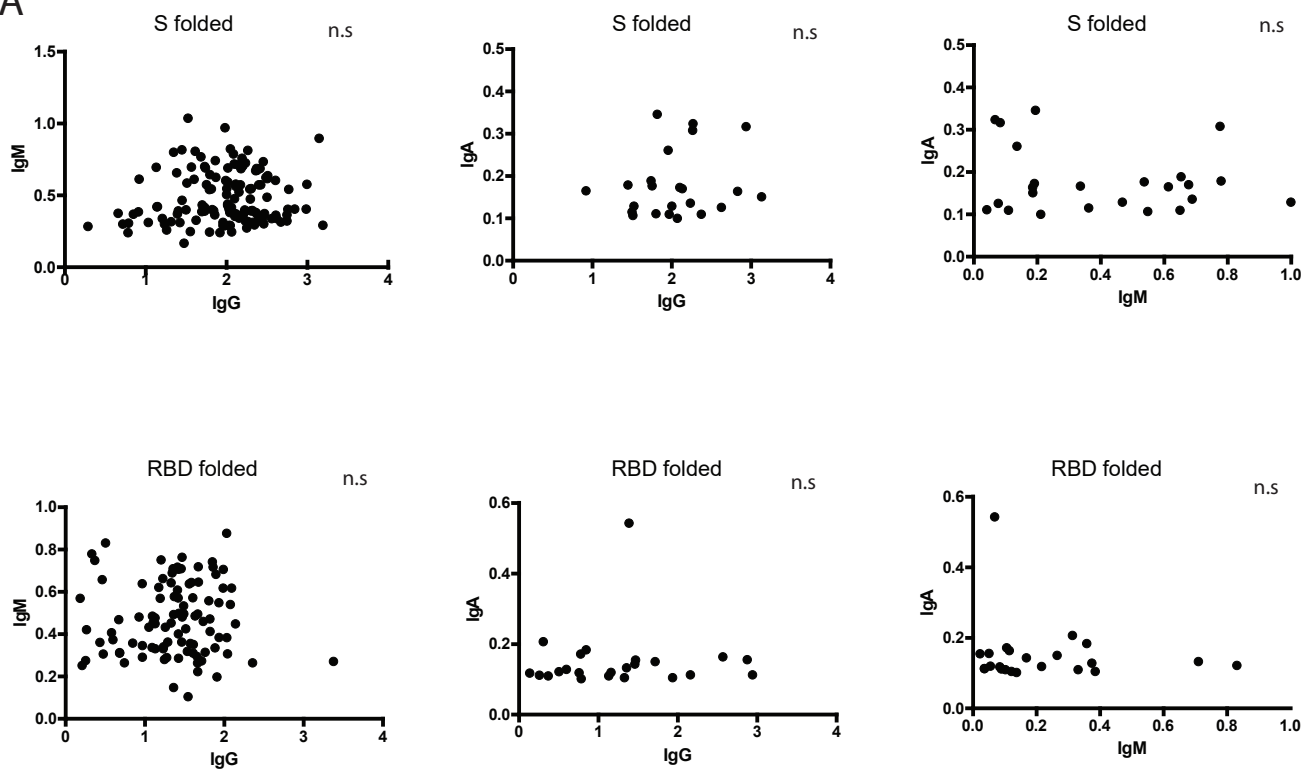

## B

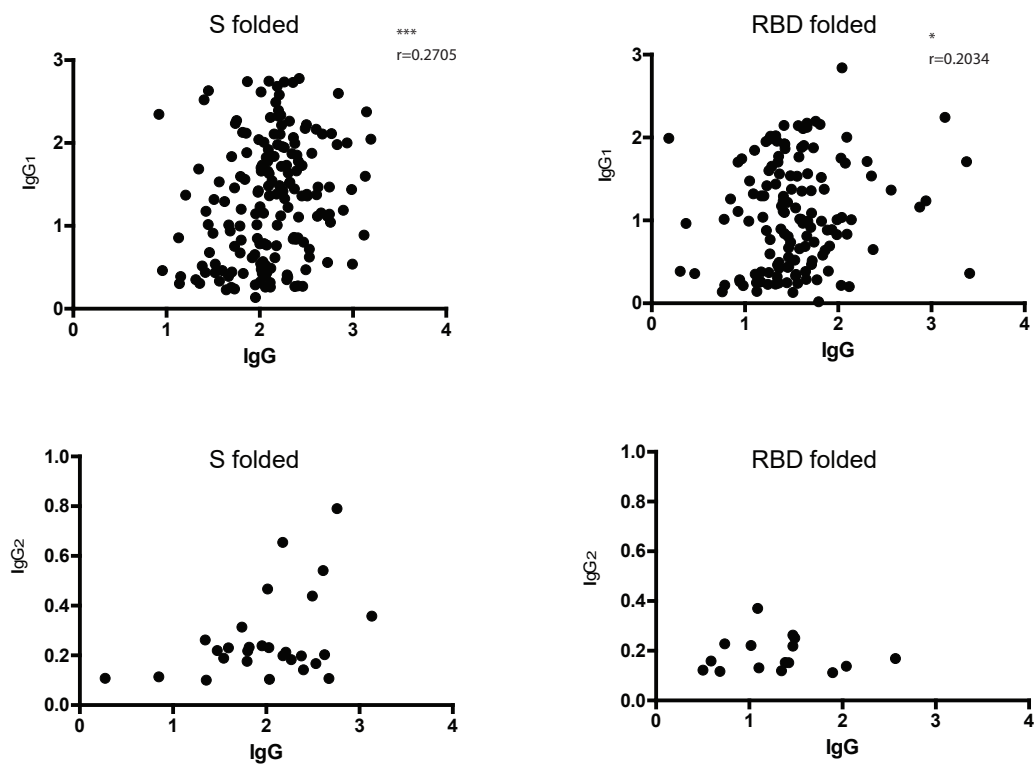

Supplement: ALL-77-230-s010.pdf [file ALL-77-230-s010.pdf]
